# Supplementary material for: Raw Sewage Harbors Diverse Viral Populations
Source: PubMed Central journal article supplement — mBio. 2011 Oct 4;2(5):e00180-11. doi: 10.1128/mBio.00180-11 (PMC3187576; doi:10.1128/mbio.00180-11), 2011-10-04

**A**

|                 |                                                    |
|-----------------|----------------------------------------------------|
| HPyV6-627a      | CAATTCTGCTGCCTAATTTTGGCTTCTGGATCCAATAC-TG          |
| HPyV6-607b      | CAATTCTGCTGCCTAATTTTGGCTTCTGGATCCAATAC-TG          |
| HPyV6-607a      | CAATTCTGCTGCCTAATTTTGGCTTCTGGATCCAATAC-TG          |
| HPyV6-SewagePCR | CAATTCNGCTGCCTAATTTTGGCTTCTGGATCCAATACCTG<br>***** |
| HPyV6-627a      | CAGTATAACCAGTCTCGGGGAGCCCCCTACACCTTTACTGA          |
| HPyV6-607b      | CAGTATAACCAGTCTCGGGGAGCCCCCTACACCTTTACTGA          |
| HPyV6-607a      | CAGTATAACCAGTCTCGGGGAGCCCCCTACACCTTTACTGA          |
| HPyV6-SewagePCR | CAGTATAACCAGTCTCGGGGAGCCCCCTACACCTTTACTGA<br>***** |
| HPyV6-627a      | CACTTTGGATGCTGGTTCATCT-CTGTGTTATACCC               |
| HPyV6-607b      | CACTTTGGATGCTGGTTCATCT-CTGTGTTATACCC               |
| HPyV6-607a      | CACTTTGGATGCTGGTTCATCT-CTGTGTTATACCC               |
| HPyV6-SewagePCR | CACTTTGGATGCTGGTTCATCTACTGTGTTATACCC<br>*****      |

**B**

|                |                                                        |
|----------------|--------------------------------------------------------|
| SA2/1-152      | GCTGGGAATAACCCCGGGCGAACCCTTGTCCATGCCCTA                |
| SA4/1-153      | GCTGGGAATAACCCCGGGCGAACCCTTGTCCATGCCCTA                |
| SA3/1-153      | GCTGCGGATGACCCTGGGCGAATCCCTGCCCATGCCCTA                |
| SA1-1/1-153    | GCTGCGGATGACCCTGGGCGAATCCCTGCCCATGCCCTA                |
| 6AIF/129-280   | GCTGCGGATAACCCCTGGGCGAACCCTTGTCCATGCCCTA               |
| RatR63/802-954 | GCTGCGGTTGACCCTGGGCGAATCCCTGCCCATGCCCTA                |
| GIII/1007-1164 | GCCACCCTGGACGATCAGGCGTTTTGTTGTTCCGGCTCAT               |
| GIV/991-1148   | GCGACCCTTGATGACCAGGCTTTTTGCTGTTCCAGGCTTAT              |
| GI/1009-1166   | GCCACTTTGGATGACCAAGCCTTTTTGCTGCTCCGTTTAAAT             |
| GII/985-1142   | GCCACCCTCGACGACCAGGCTTTTTGCTGCTCAGGCTTAT               |
| GV/1000-1157   | ACCACACTTGATGATGACGCCTTCTGTTGCTCCGCTGCT<br>* * ** ** * |

|                |                                                               |
|----------------|---------------------------------------------------------------|
| SA2/1-152      | CACCCCTACCCGAAGGCTACCACCATCTATGTGCGCAGCC                      |
| SA4/1-153      | CACCCCTACCCGAAGGCTACCACCATCTATGTGCGCAGCC                      |
| SA3/1-153      | CACCCCTACCCGAAAGCCACTACAATCTATGTGCGCAGCC                      |
| SA1-1/1-153    | CACCCCTACCCGAAAGCCACCACAATTTATGTGCGCAGCC                      |
| 6AIF/129-280   | CACCCCTACCCGAAGGCCACCACCATTTATGTGCGCAGTC                      |
| RatR63/802-954 | CACCCCTACCCGAAGGCCACCACCATCTATGTGCGCAGTT                      |
| GIII/1007-1164 | GACTTCTCCGTGGTATTAGCTACAATCACTGTCGGTGCGC                      |
| GIV/991-1148   | GACATCTCCGTGGTATCAGCTATAATCACGGTTGGCGCTC                      |
| GI/1009-1166   | GACCTTTTCGCGGCATTAGCTACAATCACTGTTGGCACCC                      |
| GII/985-1142   | GACGTCTTCGTGGCATTAGCTATAATAACTGTGGGTGCC                       |
| GV/1000-1157   | AACCTTTTACGTGGGATTTCAACCAATGACAGTAGGTAACA<br>** * * * ** ** * |

|                |                                                           |
|----------------|-----------------------------------------------------------|
| SA2/1-152      | TGTTTAGTGCCGGTGGAATACCGGTCCGCTAGGCCCCCC                   |
| SA4/1-153      | TGTTTAGTGCCGGTGGAATACCGGCCCGCTAGGCCCCCC                   |
| SA3/1-153      | TGTTTAGCGCCGGCGGGAACGCCGGCCCGTTAGGCCCCCC                  |
| SA1-1/1-153    | TGTTTAGCGCCGGCGGGAACGCCGGCCCGTTAGGCCCCCC                  |
| 6AIF/129-280   | TGTTTAGCGCCGGTGGAATGCCGGCCCATTAGGCCCCCC                   |
| RatR63/802-954 | TGTTTAGTGCCGGCGGGCAGATATCGGCCCGCTCGGCCCCCC                |
| GIII/1007-1164 | TTGTTAATGAGGGATGGAATGCCTCTGAGGACGCCCTTAC                  |
| GIV/991-1148   | TCGTCAATGAAGGCTGGAATGCCTCCGAAGACGCATTGAC                  |
| GI/1009-1166   | TTGTTAATGAAGGCTGGAATGCCTCTGAGGACGCCCTCAC                  |
| GII/985-1142   | TGGTTAATGAAGGCTGGAATGCCACCGAGGATGCGCTCAC                  |
| GV/1000-1157   | TTGTCAATGAGGGCTGGCAACCGGAGGAGCAGCAGCTTAC<br>* * * * * * * |

|                |                                             |
|----------------|---------------------------------------------|
| SA2/1-152      | CCCCATGATGGGNGAAAAAGCCCGGTCCAC              |
| SA4/1-153      | CCCCATGATGTGGGAAAAAGCCCGGGCCAC              |
| SA3/1-153      | TCCCATGATGTGTGAAAAGGCCCGGTCCAC              |
| SA1-1/1-153    | TCCTATGATGTGTGAAAAGGCCCGGTCCAC              |
| 6AIF/129-280   | TCCCTTGATGTGTGAGAAGGCCCGGTCCAC              |
| RatR63/802-954 | CCCATTAATGTGTGAGAAGGCCCGGTCTAC              |
| GIII/1007-1164 | TGCAGTGATCACTGCGGCTTACCTGACTAT              |
| GIV/991-1148   | AGCTGTGATTACCGCGGCTATCTTACTAT               |
| GI/1009-1166   | AGCTGTCATCACTGCCGCTTACCTTACCAT              |
| GII/985-1142   | TGCAGTTATTACGGCGGCTTACCTCACAAT              |
| GV/1000-1157   | GGCTGTCGCTATAGCTGCATACCTTACTGT<br>* * * * * |

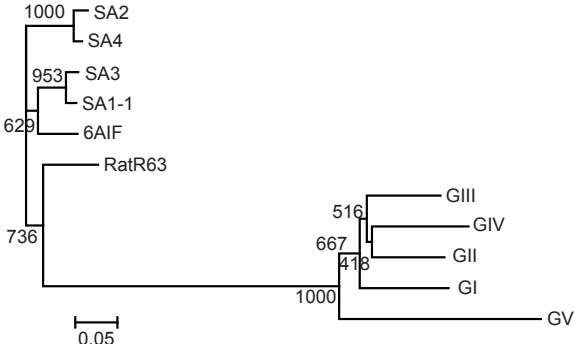

Supplement: mbo005111170sf01.pdf [file mbo005111170sf01.pdf]
