# Supplementary material for: Raw Sewage Harbors Diverse Viral Populations
Source: PubMed Central journal article supplement — mBio. 2011 Oct 4;2(5):e00180-11. doi: 10.1128/mBio.00180-11 (PMC3187576; doi:10.1128/mbio.00180-11), 2011-10-04
Supplement: mbo005111170sf03.pdf [file mbo005111170sf03.pdf]

# A Parvovirinae

C594 TLLLTGPASTGKSLLATKICQLVGNVGCYNASNVNFPFNDSCSNKLIWVEEAGNFGTQVQNFKTIIMSGQSIRLQDK  
 MZZ4 GCWINGPANTGKSTMMGSFINHFFPTGVGKPDNSNFPFNNCVNKRVIWEEEPQITNDNIEDVKCLMSGNTFFSTDIK  
 YH7D CVKMMGPANTGKTTIMESFITTYFGNNVGRPDNSFFPNSCVNKRVIWEEEPSINPGNVEAVKNIKLVSGGTFSTDDK  
 8Pd7 CFFVLIGVSNAGTKVMFIKLENLMINVGRINNINGSFIFENCISCNLISIEECCVVPQWVDDIKRIFGGENNMIDCK  
 PorFv TLLFHGPASTGKSI IAQHIAHLVNGVGCYNAANVNFPPNDCTNNKLIWVEEAGNFNSQVNFKAICSGQTIRIQDK  
 CMVga3 TINFYGPASTGKTNLAKAIVNAVQLYGCNVHQNKNFVFNDC TAKLICWEEECIMTDDWVEQAKCIMGGTFQFRI DRK  
 HepAV TINFYGPASTGKTNLAKAIVNAVQLYGCNVHQNKNFVFNDC TAKLICWEEECIMTDDWVEQAKCIMGGTFQFRI DRK  
 PorBv TLLCFYGPASTGKTNLAKAIVQACKLYGCNVHQNKNFVFNDC AAKLIVWVEEALMHNDWVEQAKCILGGTEFRI DRK  
 HumanBv TVCFYGPASTGKTNMKAIVQGI RLYGCNVHLNKGFFVFNDCRQLRVVWVEEELMHQDWVEPAKCILGGTECRI DVK  
 AA5 TWVLYGPATGKTNIAEAI AHVVPFYGCNVWTNENFPFNDCVDKMLI WVEEGKMTNKVVE SAKAILGGSKVRVDQK  
 AAVGo1 TWVLYGPATGKTNIAEAI AHVVPFYGCNVWTNENFPFNDCVDKMLI WVEEGKMTNKVVE SAKAILGGSKVRVDQK  
 BovAAV TWVLYGPATGKTNIAEAI SHVVPFYGCNVWTNENFPFNDCVEKMLI WVEEGKMTNKVVE PAKAILGGSRVVDQK  
 AleutMDV CIWFYGPAGTGKTLASLICKATVNYGMVTSNPNFPWTDGCGNRNIWAEECGNFGNVEDFKAITGGGDVVKDTK

# B Picornaviridae

AichiV PEPVVVYLGGPPASLLAQTLRSQRLAGTCEYFDGYTGQTVHFIDDIQDDEGRDWFANFPNLVSSAPFIVPMA5L  
 SenecaV VEPVVVVLRGKSTLIIAQAVSKLSFGRSYDLGDYENQYSVIMDDLGQNDGEDPFCQMVSTAQFLPNMADL  
 SaffoldV PEPVVVVLRGNASQIIAQAVSKLSFGRSYDLGDYENQYSVIMDDLGQNDGEDPFCQMVSTAQFLPNMADL  
 HumEvd IEPVCLLIRGSPTEG IARAIAADKYHSSPDHFDGYKQVVVIMDDLGQNDGKMSLFCQMVSTVDFIPPMASL  
 AvianSV FEPVGMVLHGKPTSIIGRQLCKMMGKGDPHFDGYTGQEVVIMDDLGQNDGKDCALLCQMI STTEFIPPMASL  
 HepAV CEPVVVYLGRKRSIALATKICKHYGVESDYWDGYSGLVCI DDIGQNTDEDWSDFCQLVSGCPMLRNMA5L  
 AvianEV AEPVLYLYGNRSMATAVAKLCKELGISDFWDGYAGQPVVIMDDLGQSSDEDWTNFCQLVSSCPRLRNMA5L  
 EquineRBV PEPVICLLKGRAATVIAKAVSIVNTGKSDFFDGYAGQNVVIMDDLGQNDGKDFRNFQCMVSTVFLFPVADL  
 FootMDV PEPVVVCLRGSANVLAQASITSHFTGRPDHFDGYNQAAVVMDDLGQNDGKDFKFIQAQMVSTGFIIPPMASL  
 PorTV1 PEPVVVVLRGAPSEMLARMLSYTLVGKTKHFDGYKQAVTVIDDLDGQSDGEDFRLFCQLVSTTECIVPMADL  
 HumPv1 VEPGIWQIEGEPHTHLKQKCKSLNSEFMDGYDNQDHLIDDLGQTKKEDIEMLCNCSISVFFIVPM AHL  
 DuckHAV PEPGIWISGSPSNYLVKEIAKLLKHWKSKHMDGYVSEIHWVDFDQNEEEDYSLICNLISVFFITPKASV  
 O15N SEPVGIFIGGDASNILPRVLKRVGVHEKYWELYDQPPVYVLELLELQVDEEDPMIVLRAINSVRMPINKAHL  
 BV10 VNSIYQHLKQKYEI PANESFESHVNDKYLTYNQYVLTIDDLFDQDNC PDINSALNMNISWCSHYTNAQAL  
 C141 QEPHIGVLQGGPPNVGLQCLPMPTRYAHQKDFYDAYENESIFYMDDVQGGIAQWRTFINMISRSQIPLGLCS

# C Picobimaviridae - segment 1

HFV\_s1gp2 TRLPFI GVMCVNFTTPGESYKNKSPINIAAQNVYTYVRHMNSGHANYEQ  
 HFV\_hypo ANVFPAGNASIMYLPSPGISTTVLDGLSMAANQLYAVVRKSNSSGAKYV5EA  
 5FK8 ASFPYLVGLIMNVIPTIGNSFDVTLVINVASINTYTKIRHDSNGHANYD  
 C530 GSI5FVGMICITIKYKPSVGYSTYGHASVNMARNLYSFVRHANSAGHTNYDA  
 BHEW TSDIYGVMSFSHYSRFICELWNDPINVANAAYISVFLRQANSCKANYDA  
 XC64 ITSDGGSCMIRFVPTGYDFDLXLVGNIAASTAVLWHRHANFGSGCNYDV  
 8ATT SGM5YVGMILAMLPFGI IDEWFDLVNIAIRDKYMFIRYANLGYFNVDV

# segment 2

HFV YPGISAEDVMQSYSRHGLDMNLEKQYVSKQDCTYLRRWHHTDYRVDGMCGVYSTMRALG  
 BPV FPGIQVEDVMQYATSHGLEMNETKQYVSKHDCVFLRRWHHEDYQIAGCEGCVGYSTYRALG  
 HPvh YPGITADKVMRSYTHGLEMNETKQYVSKHDCYTLRRWHHTKYRVDGCVGYSTYRALG  
 HPvb YPGITVDDVRSYSSHGEMNPKQYVSKQECTYLRRWHHTQNYRVDGCVGYSTYRALG  
 HPve YPGINVDVVDYSAHGQEMNTPKQYVSKHDCYTLRRWHHEDYRISDVCVGYSTYRALG  
 HPv1 FPGITVEDKVVDTYSAHGQEMNPKQYVSKHDCYTLRRWHHTDYRVDGCVGYSTYRALG  
 HPvj YPGITVEDVMQYATSHGLEMNETKQYVSKHDCVYTLRRWHHTKYRVDGCVGYSTYRALG  
 HPvk YPGISVEDVMQYATSHGLEMNETKQYVSKHDCYTLRRWHHTQNYRVDGCVGYSTYRALG  
 HPvm YPGISVEDVMQYATSHGLEMNETKQYVSKHDCYTLRRWHHTQNYRVDGCVGYSTYRALG  
 HPvI YPGINVEDVTVQYSAHGQEMNTPKQYVSKHDCYTLRRWHHTDYRINDVCVGYSTYRALG  
 HPvJ YPGITVEDVTRSYSAHGQEMNPKQYVSKHDCYTLRRWHHTDYRVDGCVGYSTYRALG  
 HPvd FPGITVDKVDITYSRHGQEMNPKQYVSKHDCVYTLRRWHHTKYRVDGCVGYSTYRALG  
 HPvc IADMSAEQLVDYLGKFLPANPTKQYVSDNTDLTFLQRMNVGFFSSNTLGAFFYPTIRGLN  
 HPvk LAMDAKEVVDYLGQYGLPANPTKQYVSGTETLTFLLQRYFRQGFVSGGVGAYYPTIRALN  
 VZ58 YPGITADNVMQYASHGQDMNLKQVHVSKHDCYTLRRCHQDDYRIKVCWAGVYSTYRALG  
 DMYI YPGIKVDVDDVYTAHGQEMNPKQYISLRDCVYTLRRWHHTDYRVDGCVGYSTYRALG  
 C108 YPGCRVEDVMQYATSHGLEMNETKQYVSKHDCYTLRRWHHTDYRVDGCVGYSTYRALG  
 C98 FPGCSVEDVMQYATSHGLEMNETKQYVSKHDCYTLRRWHHTQNYRVDGCVGYSTYRALG  
 C586 YPGITVDDVRSYSSRGLMNPDKQYVSKHDCYTLRRWHHTQNYRVDGCVGYSTYRALG  
 C477 YPGIDVEAVMQYASHGQEMNPKQYVSKHDCVYTLRRWHHTDYRVDGCVGYSTYRALG

# D Dicrostoviridae

BQCv GVQMLREKVQCEIEAAQKGLIFDITLKDERRKPKHAKHSRMFSNGPIDYVWSKMYFNPIVAVLSELKN  
 HFV KAILLRQQVEEII SQALGVRQFIDITLKDERRKPIHKAHTRMFSACPLDYIACKMYFGGVSLVQKSRN  
 TV LAVELEEKVEIHEDLAQGVRYFDALDKDERKPREKAHKTRAFSGCPLEYAVCKMYFQGI VSVLTKCKN  
 PSIV LALDLRQVHEHIESLADGISFIDITLKDERRKAEKAKHTRLFSASPLPYILCRMYLQGGVSRILIRGI  
 HCV RAGPVRERCAKIIDLANNERYFIDITLKDERRKIAKWKTRVFSACSQDYIACKQYQGI VGLLTRHRI  
 DCV YALALRQVHEQLIEDCSGKISFVDITLKDERRDIAKVVNTRVFSAGPQHFAFRKQYFLFFAAWLMHNR  
 CPV RAQELRRDVEELIDNCKGI IKFVDITLKDERRPIEKVDATRVFSAGPQHFAFRKQYFLFFAAWLMHNR  
 KBV LNEDEVLAQVRLQAAEGRKLWLDITLKDERRPIEKVNQTRVFSNGPMDFAFRMYLGLFIAHLMENRI  
 IAPVB LNEDEVLAQVRLQAAEGRKLWLDITLKDERRPIEKVNQTRVFSNGPMDFAFRMYLGLFIAHLMENRI  
 ABPV LDEDEVFAVKTRIQANAGVTRWVDTLKDERRPIEKVDQTRVFSNGPMDFAFRMYLGLFIAHLMENRI  
 SIV IDPDVMQVQVHERIENAQGI RTWVDTLKDERRPIEKVDATRVFSNGPMDFAFRKQYFLFIAHLMENRI  
 ALPV ACKQLMADVDELQAQCMNDVRPIDITLKDAPKIPAKANVTRLEFTAACPLHYILFRQYFLFIAHAMRNR  
 RFPV YAVALRADVDKLETDINGTRPWTDTLKDQKIAI AKANATRLFSAAPMHYIALRKCVPAFVAHLSRMR  
 TSV DLKEHVEKIVDKAKDGI VDVSPAATLKDERRPLKVKQATRVFAASNQGLLALRRYLSFDLHVMTNR  
 MCDV ELKEHVELIISKARKGIVDTEFTATLKDERRPLAKVEATRVFAA TNQALLAQRYYLSYLEHVMILNRV  
 C1027 KAQEMKTI VQDQVNGMKGGFVFTDTLKDETRPIEKVMETRLFAAAPMDFIVFRMYFMSFLAWMMNRNI  
 C822 KAQEMKTI VQDQVNGMKGGFVFTDTLKDETRPIEKVMETRLFAAAPMDFIVFRMYFMSFLAWMMNRNI  
 C982 KLNRLKRVKQVQVEEMGLYQVFDITLKDDETLPKMKVEITRVFAAAPMDFIAFRMYFMSFLAWMMNRNI  
 GAS3 KALELRAIVDQLRVDCEMNGVITCADTMKDERRPIAKVETRMRFSACPMHFVLSYTYGFAFIIMHNR  
 QUOG EAQQLRADVDELIEDCMVRFRFSLILKDERREKAKVDVTRVFSAGPQHFAFRKQYFLFFAAWLMHNR  
 ZM5I KRSNLRADVDELIEDICIGKISSLILKDERREKAKVDVTRVFSAWSSTRFVGSQVLSFFAAWLMHNR  
 A2AD MALEVERVGLGLQDCDGIQRWSDITLKDERRPIAKVDATRVFCGGPVHILFRQYFLFAAWIMHNR  
 C1164 DLNIAITDFENKVKLEGLIPNFFIDQTKDERRPIAKVQATRMFAIGNMTLVLIRQYFSWFDSEMKKQLI  
 C1018 DLNIAITDFESKVKLEGLIPNFFIDQTKDERRPIAKVQATRMFAIGNMTLVLIRQYFSWFDSEMKKQLI  
 C849 DLNIAITDFENKVKLEGLIPNFFIDQTKDERRPIAKVQATRMFAIGNMTLVLIRQYFSWFDSEMKKQLI  
 C994 DLNIAITDFESKVKLEGLIPNFFIDQTKDERRPIAKVQATRMFAIGNMTLVLIRQYFSWFDSEMKKQLI
