# Supplementary figures and images for: Raw Sewage Harbors Diverse Viral Populations
Source: PubMed Central journal article supplement — mBio. 2011 Oct 4;2(5):e00180-11. doi: 10.1128/mBio.00180-11 (PMC3187576; doi:10.1128/mbio.00180-11), 2011-10-04

# Dicistroviridae

## Drosophila C virus - 9.3 Kb

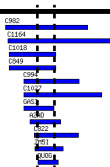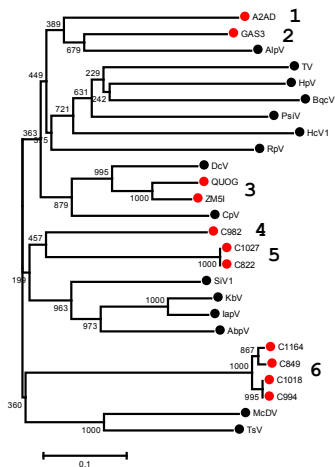

DNA – 6/11 novel viruses

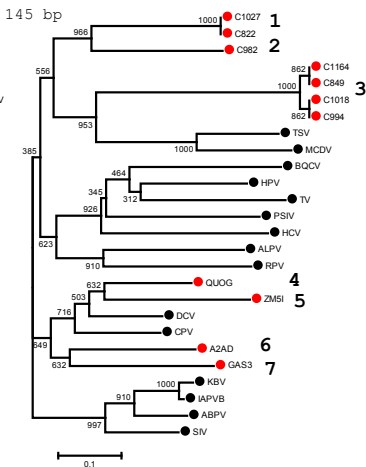

Protein – 7/11 novel viruses

Supplement: mbo005111170sf02.pdf [file mbo005111170sf02.pdf]
